# Supplementary material for: A New Lignanamide from the Root of Lycium yunnanense Kuang and Its Antioxidant Activity
Source: PubMed Central journal article supplement (PMC6017700; doi:10.3390/molecules23040770), 2018-03-27
Supplement: molecules-23-00770-s001.pdf [file molecules-23-00770-s001.pdf]

## Supplementary Materials

# A New Lignanamide from the Root of *Lycium yunnanense* Kuang and Its Antioxidant Activity

Xin-Heng Zheng, Yuan-Peng Huang, Qiu-Ping Liang, Wei Xu, Ting Lan, Guang-Xiong Zhou \*

Guangdong Province Key Laboratory of Pharmacodynamic Constituents of Traditional Chinese Medicine and New Drugs Research, Institute of Traditional Chinese Medicine and Natural Product, College of Pharmacy, Jinan University, Guangzhou 510632, China; 13751866247@163.com (X.-H.Z.); pennhuang@sina.com (Y.-P.H.); desert\_liang@163.com (Q.-P.L.); xwnail2003@163.com (W.X.); lanting842358215@163.com (T.L.)

\* Correspondence: guangxzh@sina.com; Tel.: +86-20-8522-1469; Fax: +86-20-8522-1559

# Contents

|                                                                                                                                                                                                                   |    |
|-------------------------------------------------------------------------------------------------------------------------------------------------------------------------------------------------------------------|----|
| Figure S1-1. $^1\text{H}$ NMR spectrum (600 MHz) of compound <b>1</b> in methanol- $d_4$ .....                                                                                                                    | 4  |
| Figure S1-2. $^{13}\text{C}$ NMR spectrum (150 MHz) of compound <b>1</b> in methanol- $d_4$ ....                                                                                                                  | 4  |
| Figure S1-3. DEPT-135 spectrum (150 MHz) of compound <b>1</b> in methanol- $d_4$ ...                                                                                                                              | 5  |
| Figure 1-4. $^1\text{H}$ - $^1\text{H}$ COSY spectrum (600 MHz) of compound <b>1</b> in methanol- $d_4$ .....                                                                                                     | 5  |
| Figure S1-5. HMQC spectrum (150 MHz) of compound <b>1</b> in methanol- $d_4$ .....                                                                                                                                | 6  |
| Figure S1-6. HMBC spectrum (150 MHz) of compound <b>1</b> in methanol- $d_4$ .....                                                                                                                                | 6  |
| Figure S1-7. NOESY spectrum (600 MHz) of compound <b>1</b> in methanol- $d_4$ .....                                                                                                                               | 7  |
| Figure S1-8. HR-ESI-MS of compound <b>1</b> .....                                                                                                                                                                 | 7  |
| Figure 1-9. IR spectrum of compound <b>1</b> .....                                                                                                                                                                | 8  |
| Figure 1-10. CD spectrum and UV spectrum of compound <b>1</b> in MeOH .....                                                                                                                                       | 8  |
| Figure S1-11. B3LYP/6-31 G optimized lowest energy 3D conformer of <b>1</b> .....                                                                                                                                 | 9  |
| Table S1. B3LYP-Calculated relative energies ( $\text{kcal mol}^{-1}$ ) and conformational population (%) for the most stable conformers of (7 <i>S</i> ,7' <i>S</i> ,8 <i>S</i> ,8' <i>S</i> )- <b>1</b> . ..... | 9  |
| Figure S2-1. $^1\text{H}$ NMR spectrum (600 MHz) of compound <b>2</b> in methanol- $d_4$ ...                                                                                                                      | 10 |
| Figure S2-2. $^{13}\text{C}$ NMR spectrum (150 MHz) of compound <b>2</b> in methanol- $d_4$ ..                                                                                                                    | 10 |
| Figure S2-3. HR-ESI-MS of compound <b>2</b> .....                                                                                                                                                                 | 11 |
| Figure S3-1. $^1\text{H}$ NMR spectrum (600 MHz) of compound <b>3</b> in methanol- $d_4$ ...                                                                                                                      | 11 |
| Figure S3-2. $^{13}\text{C}$ NMR spectrum (150 MHz) of compound <b>3</b> in methanol- $d_4$ ..                                                                                                                    | 12 |
| Figure 3-3. HR-ESI-MS of compound <b>3</b> .....                                                                                                                                                                  | 12 |
| Figure S4-1. $^1\text{H}$ NMR spectrum (300 MHz) of compound <b>4</b> in methanol- $d_4$ ...                                                                                                                      | 13 |
| Figure S4-2. $^{13}\text{C}$ NMR spectrum (75 MHz) of compound <b>4</b> in methanol- $d_4$ ....                                                                                                                   | 13 |
| Figure S4-3. HR-ESI-MS of compound <b>4</b> .....                                                                                                                                                                 | 14 |

|                                                                                                 |    |
|-------------------------------------------------------------------------------------------------|----|
| Figure S5-1. $^1\text{H}$ NMR spectrum (300 MHz) of compound <b>5</b> in methanol- $d_4$ ...    | 14 |
| Figure S5-2. $^{13}\text{C}$ NMR spectrum (75 MHz) of compound <b>5</b> in methanol- $d_4$ .... | 15 |
| Figure S5-3. HR-ESI-MS of compound <b>5</b> .....                                               | 15 |

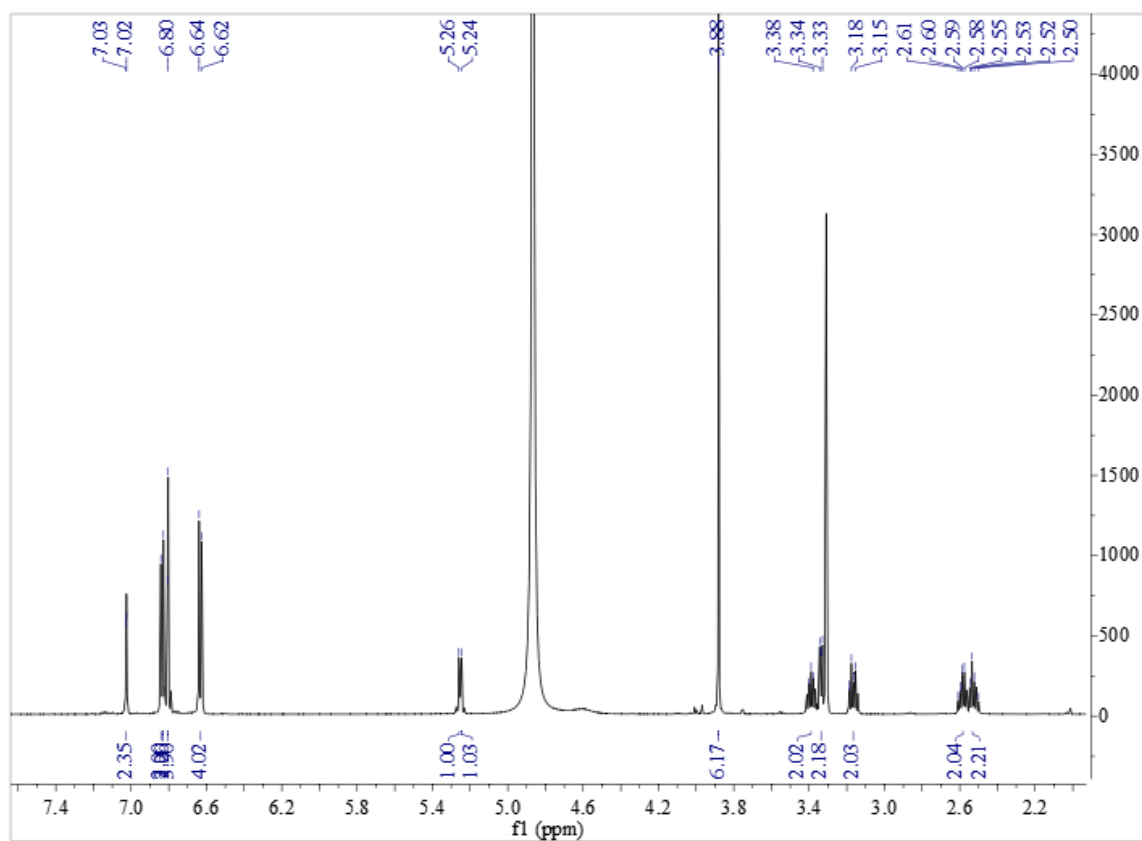

**Figure S1-1.**  $^1\text{H}$  NMR spectrum (600 MHz) of compound **1** in methanol- $d_4$

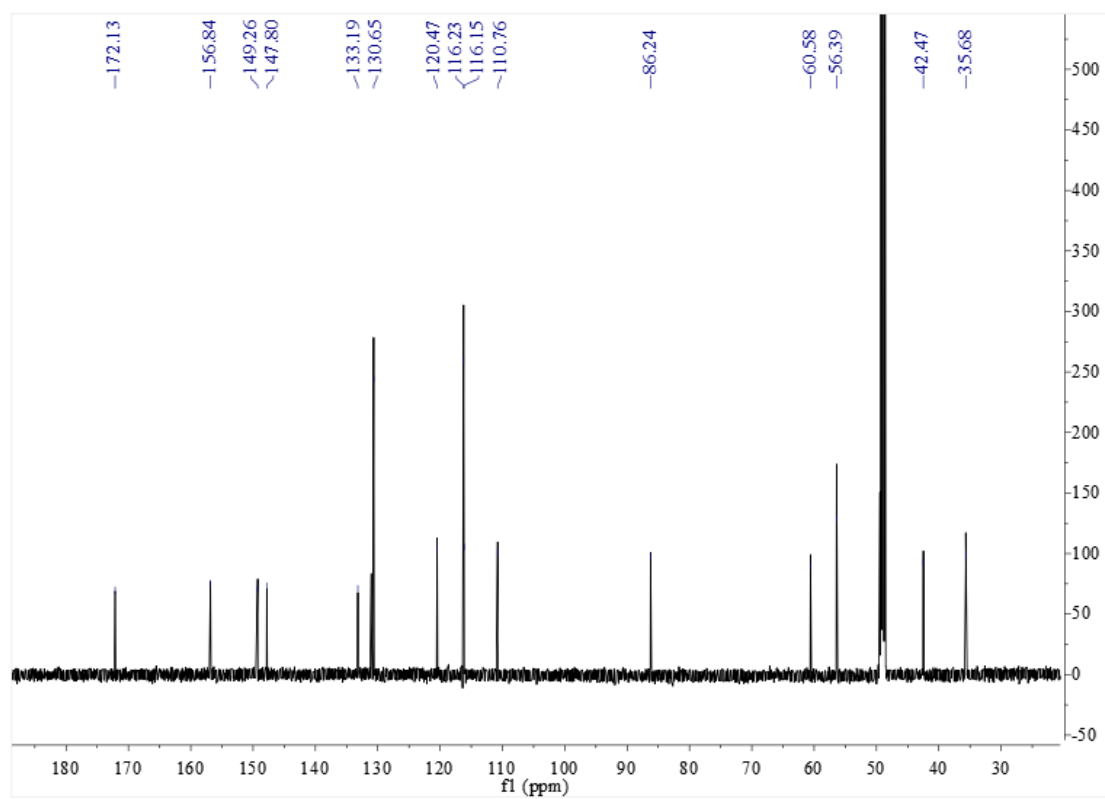

**Figure S1-2.**  $^{13}\text{C}$  NMR spectrum (150 MHz) of compound **1** in methanol- $d_4$

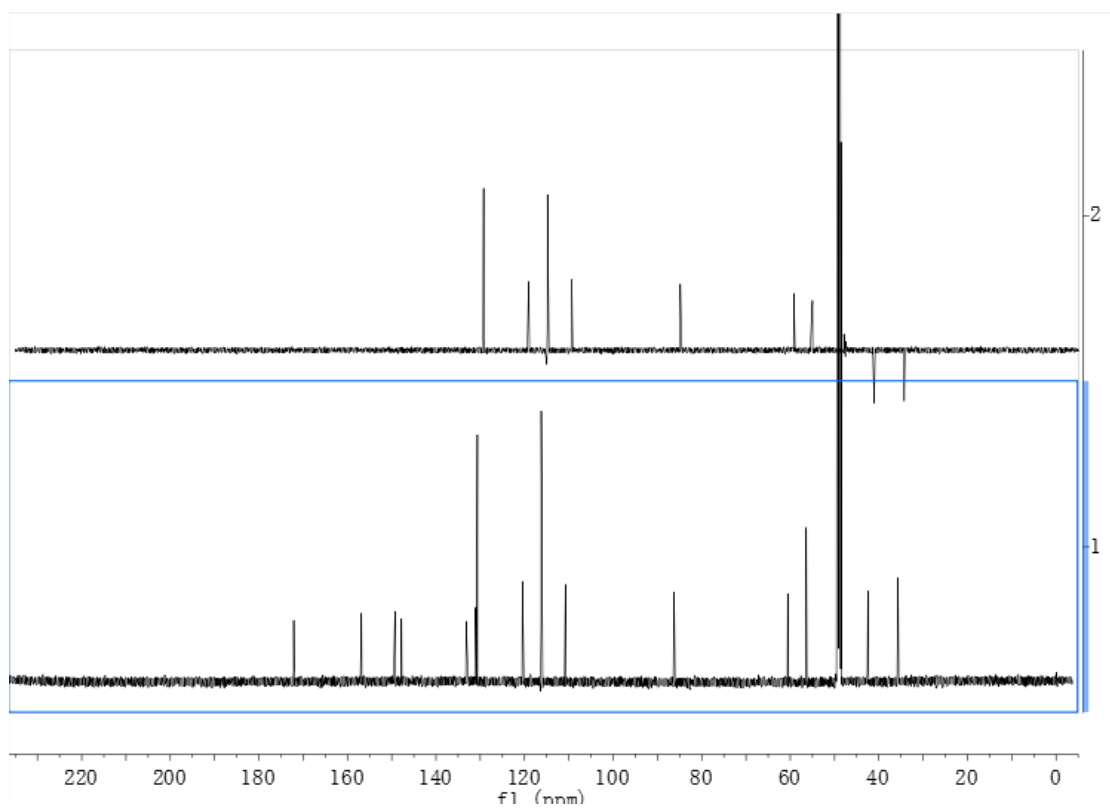

Figure S1-3. DEPT-135 spectrum (150 MHz) of compound **1** in methanol-*d*<sub>4</sub>

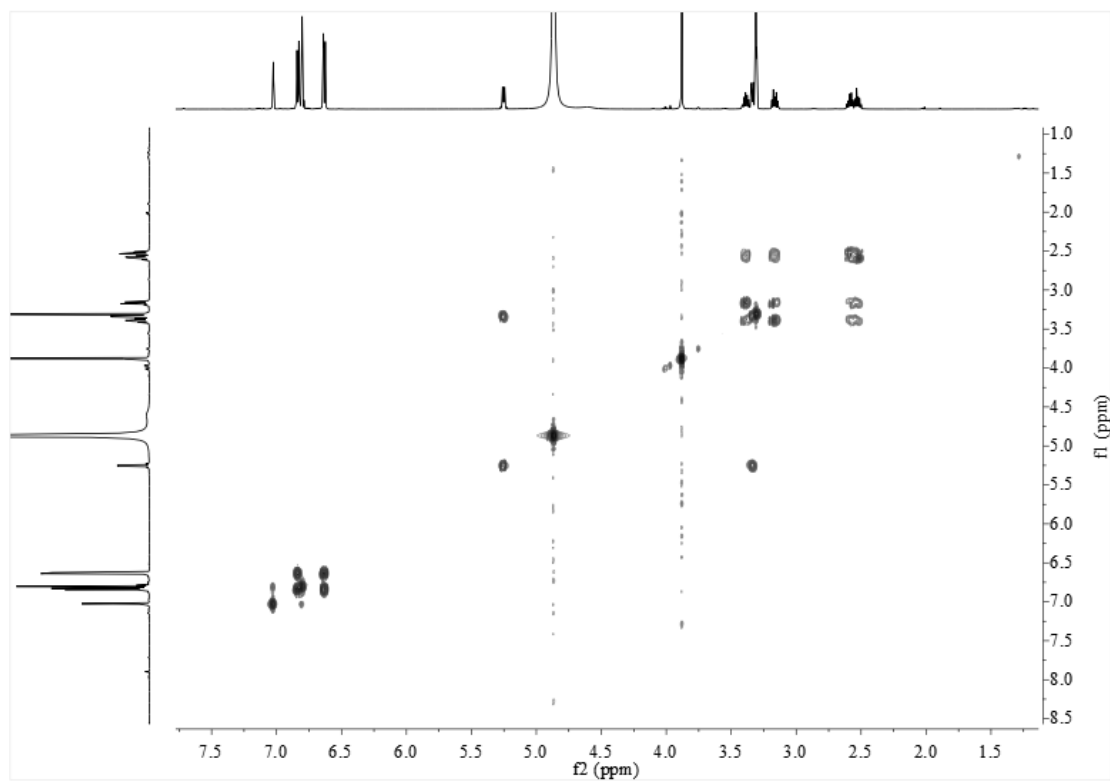

Figure S1-4. <sup>1</sup>H-<sup>1</sup>H COSY spectrum (600 MHz) of compound **1** in methanol-*d*<sub>4</sub>

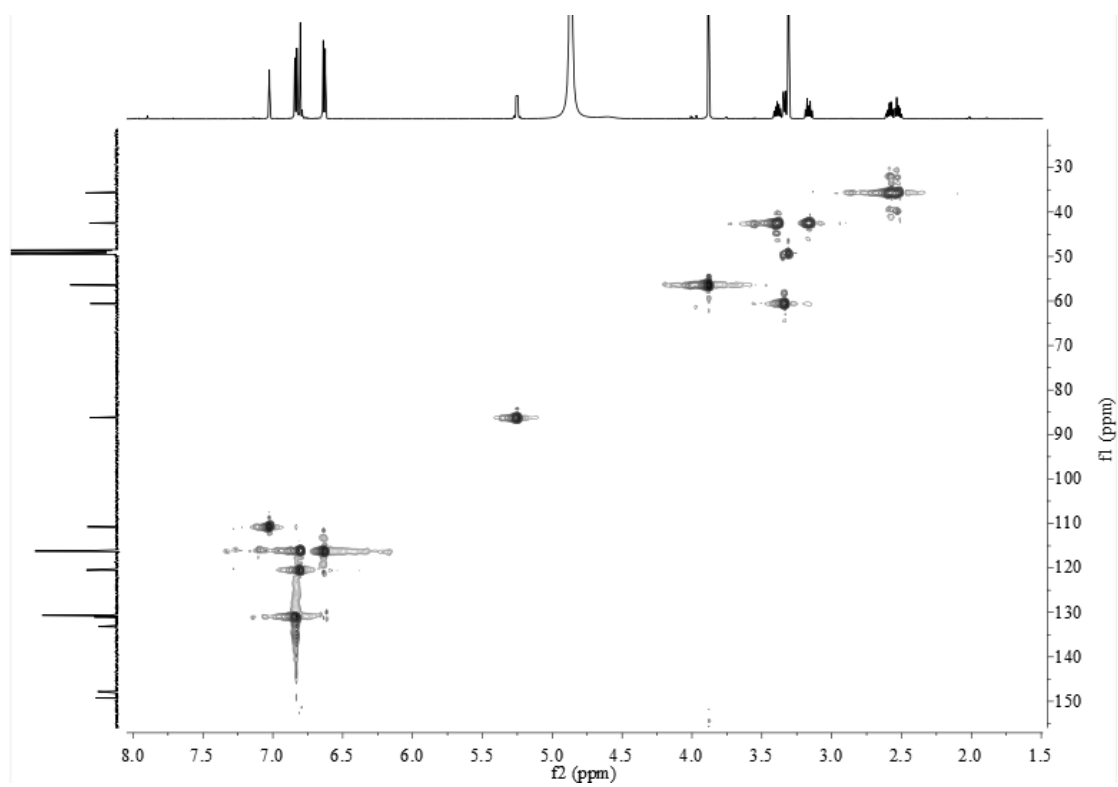

**Figure S1-5.** HMBC spectrum (150 MHz) of compound **1** in methanol- $d_4$

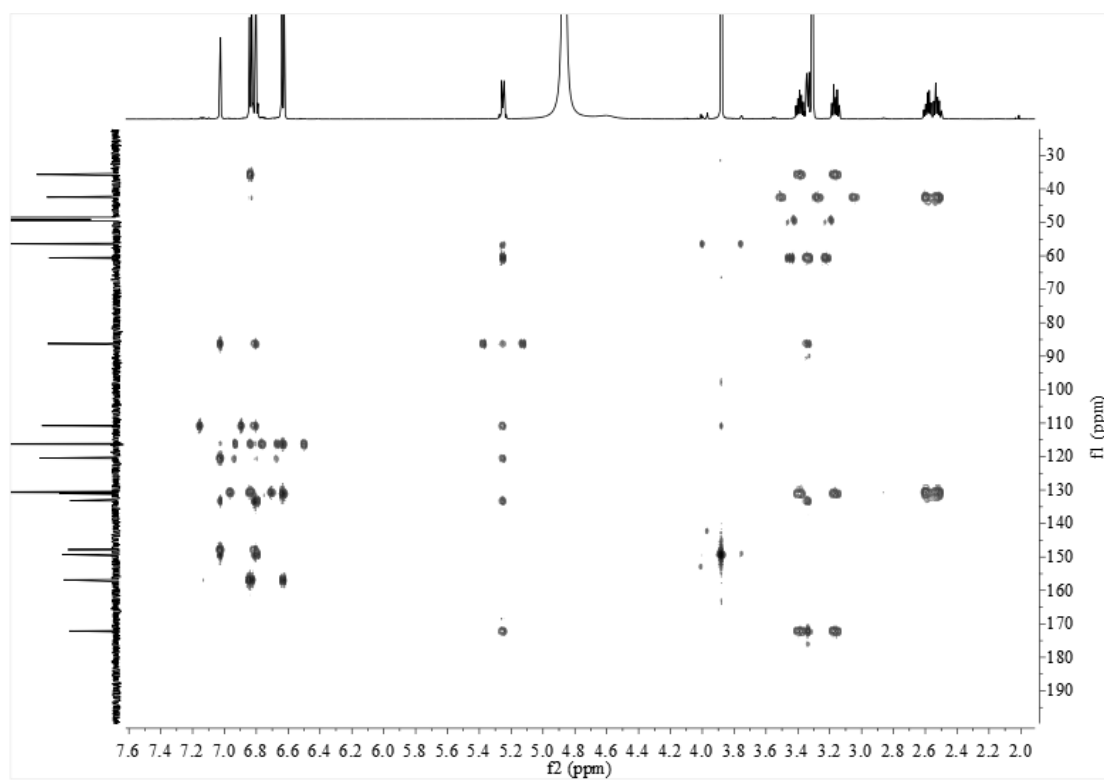

**Figure S1-6.** HMBC spectrum (150 MHz) of compound **1** in methanol- $d_4$

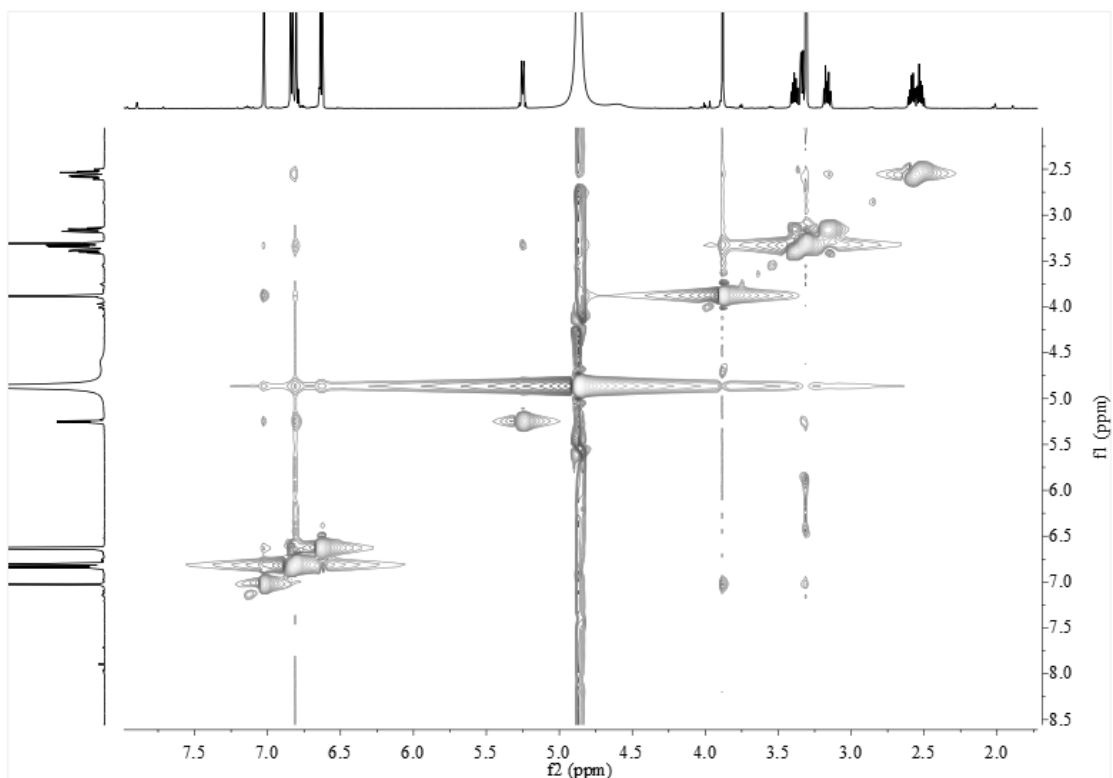

Figure S1-7. NOESY spectrum (600 MHz) of compound **1** in methanol-*d*<sub>4</sub>

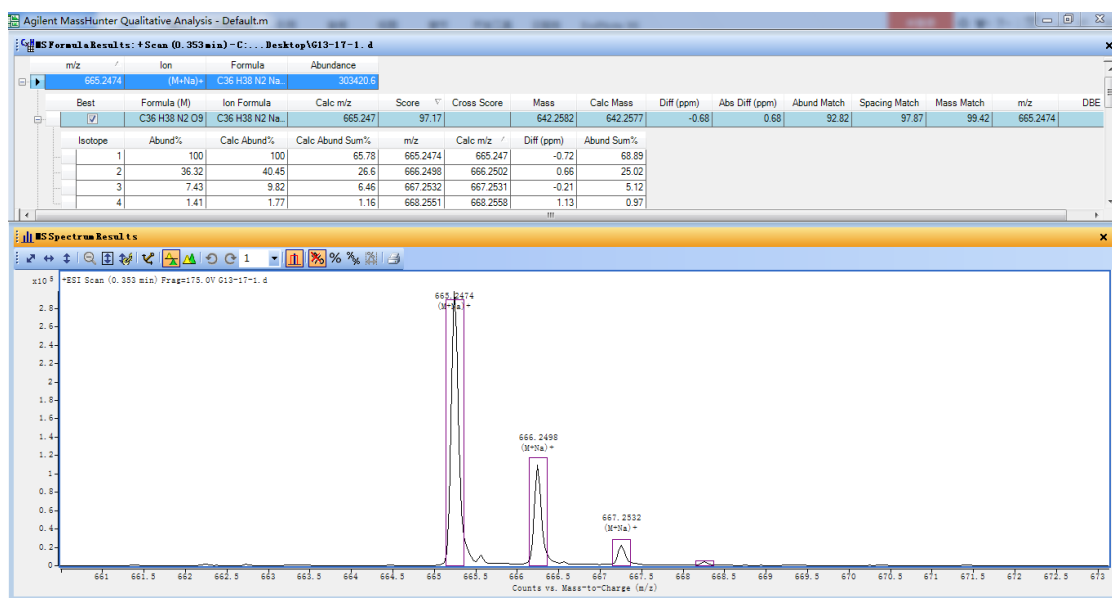

Figure S1-8. HR-ESI-MS of compound **1**

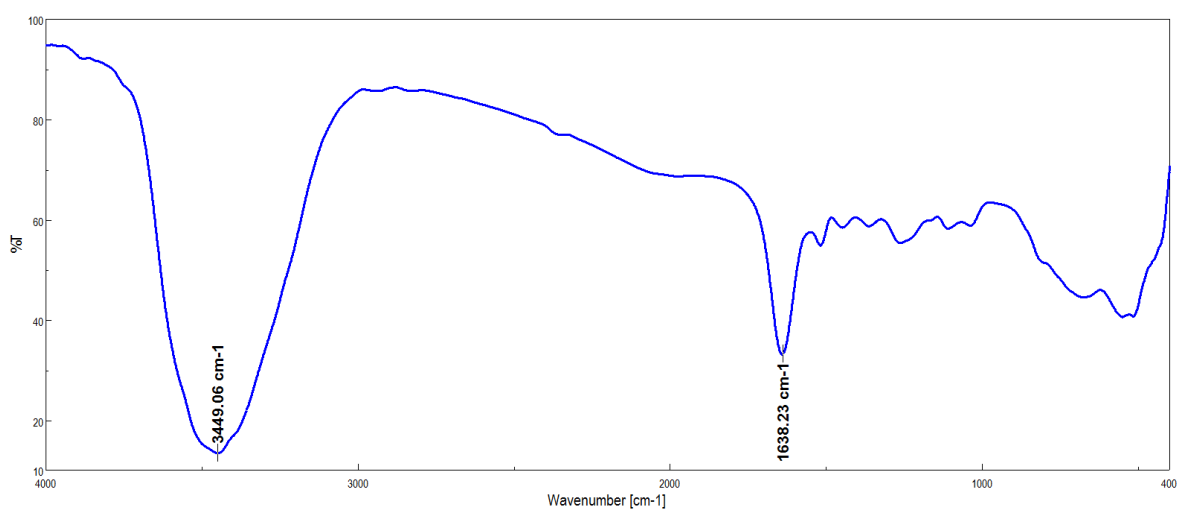

**Figure S1-9.** IR spectrum of compound **1**

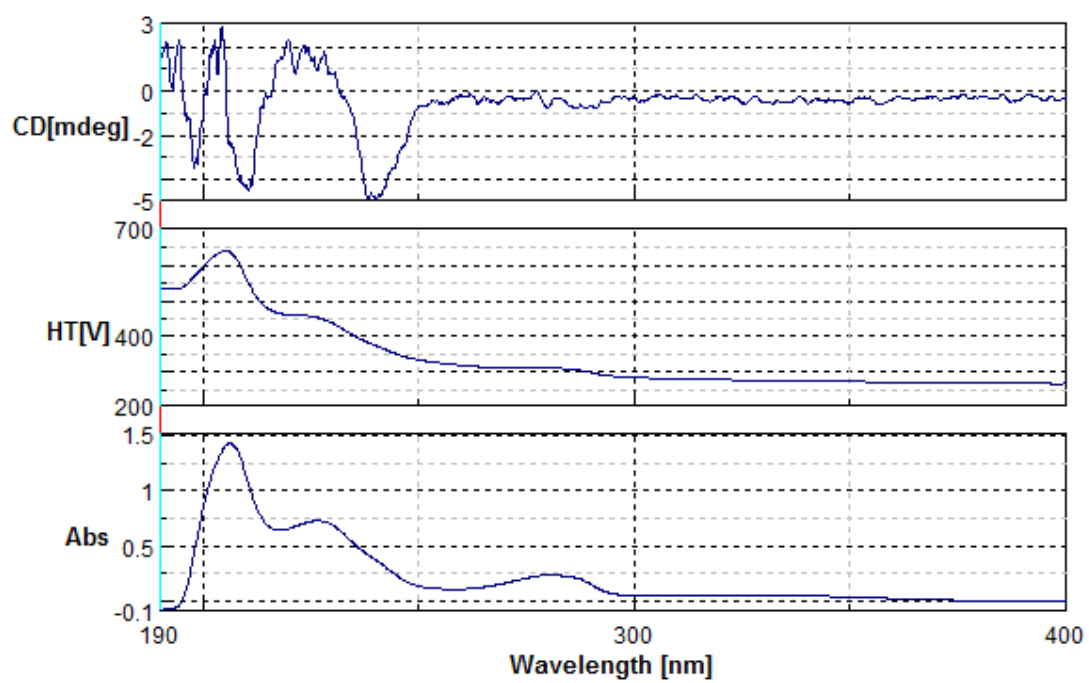

**Figure S1-10.** CD spectrum and UV spectrum of compound **1** in MeOH



| Label | Conformer                                                                           | Boltzmann weighting factors |
|-------|-------------------------------------------------------------------------------------|-----------------------------|
| C1    | 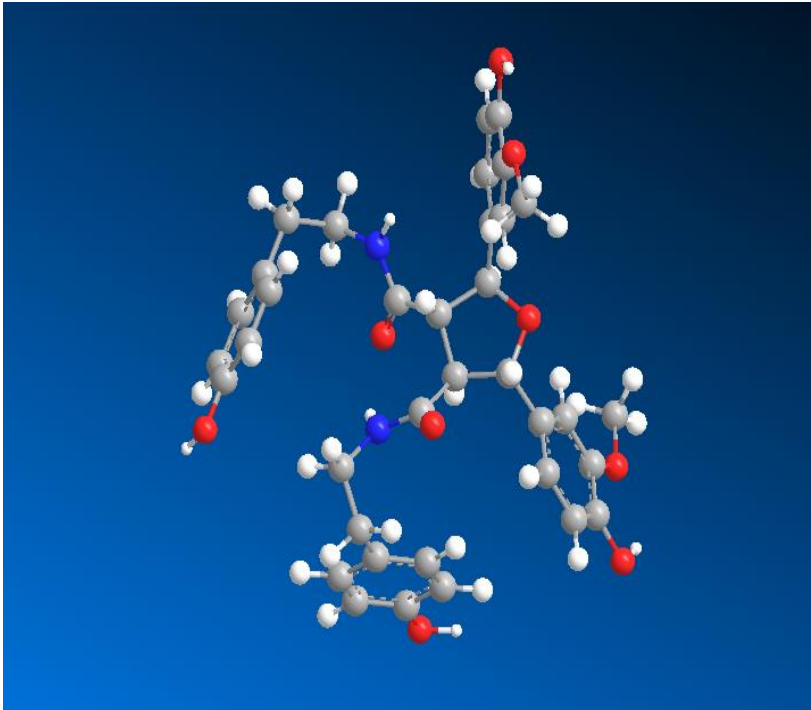 | 99.81%                      |

**Figure S1-11.** B3LYP/6-31 G optimized lowest energy 3D conformer of **1**.

| Comound  | conformer | $\Delta E$ (kcal/mol) | Population (%) |
|----------|-----------|-----------------------|----------------|
| <b>1</b> | C1        | 0                     | 99.81          |
|          | C2        | 0.0066495             | 0.09           |
|          | C3        | 0.0066496             | 0.09           |
|          | C4        | 0.0080866             | 0.02           |

<sup>a</sup>Relative to conformer C1 with E6-31+G(d) = -2181.8637403 Kcal/mol. <sup>b</sup>Calculated using free energy values from Gaussian 03W according to  $\Delta G = -RT \ln K$ .

**Table S1.** B3LYP-Calculated relative energies (kcal mol<sup>-1</sup>) and conformational population (%) for the most stable conformers of (7*S*,7'*S*,8*S*,8'*S*)-**1**.

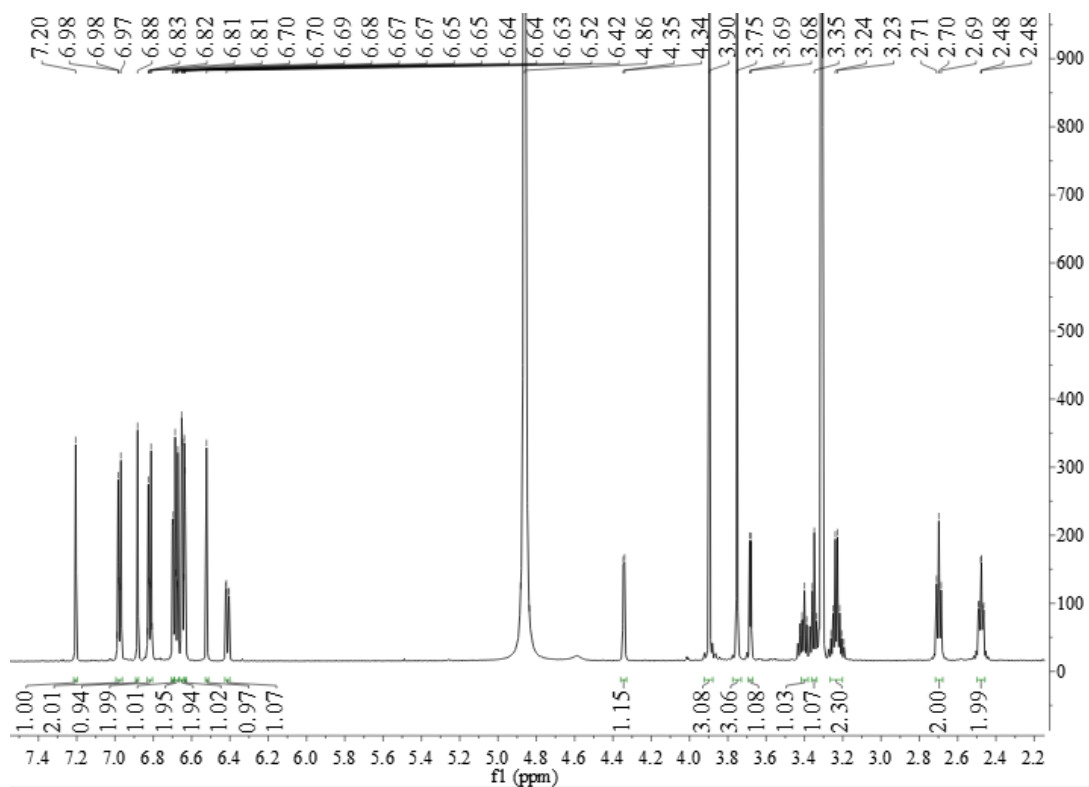

**Figure S2-1.**  $^1\text{H}$  NMR spectrum (600 MHz) of compound **2** in methanol- $d_4$

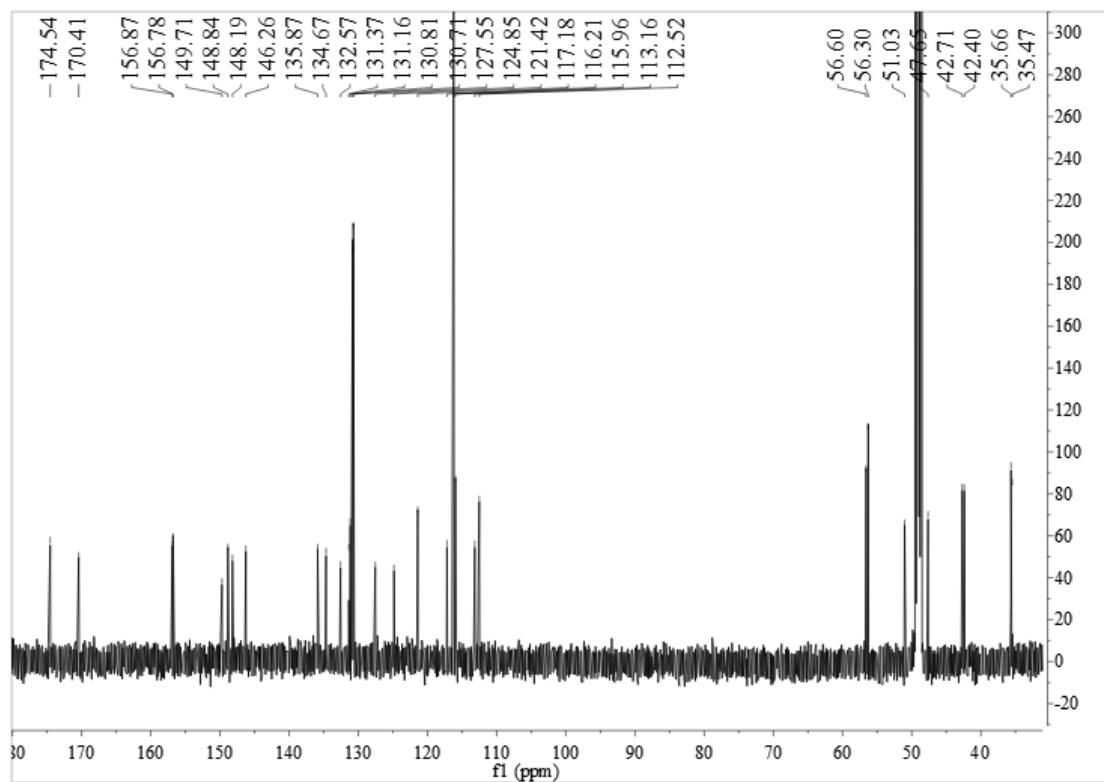

**Figure S2-2.**  $^{13}\text{C}$  NMR spectrum (150 MHz) of compound **2** in methanol- $d_4$

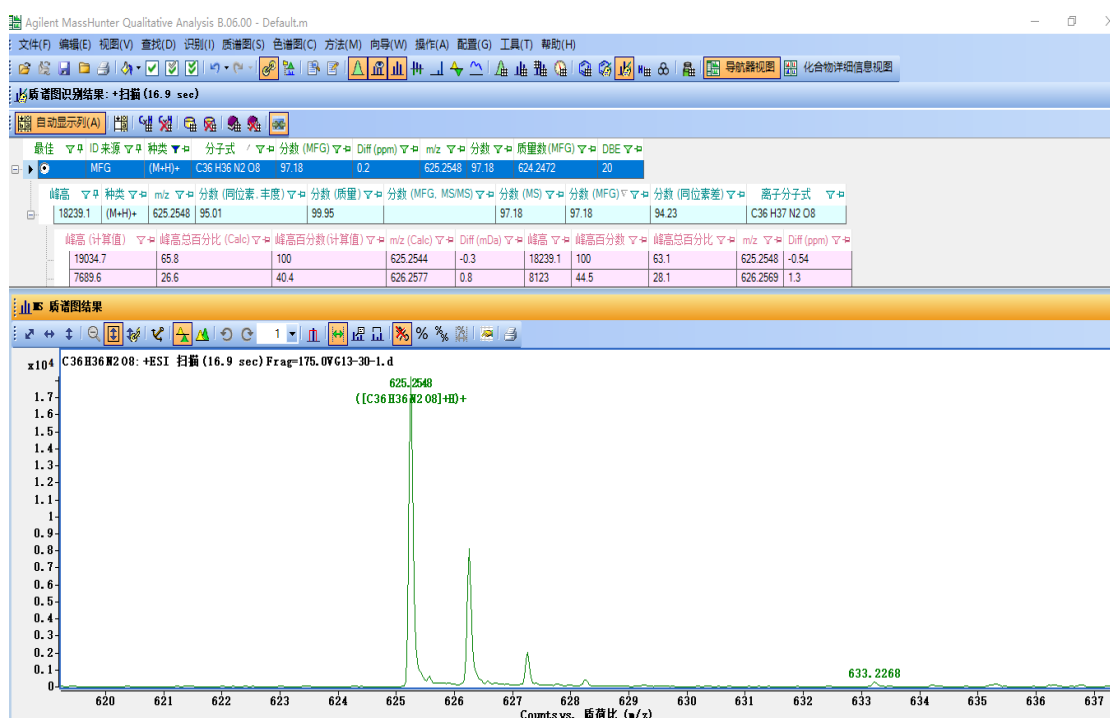

Figure S2-3. HR-ESI-MS of compound 2

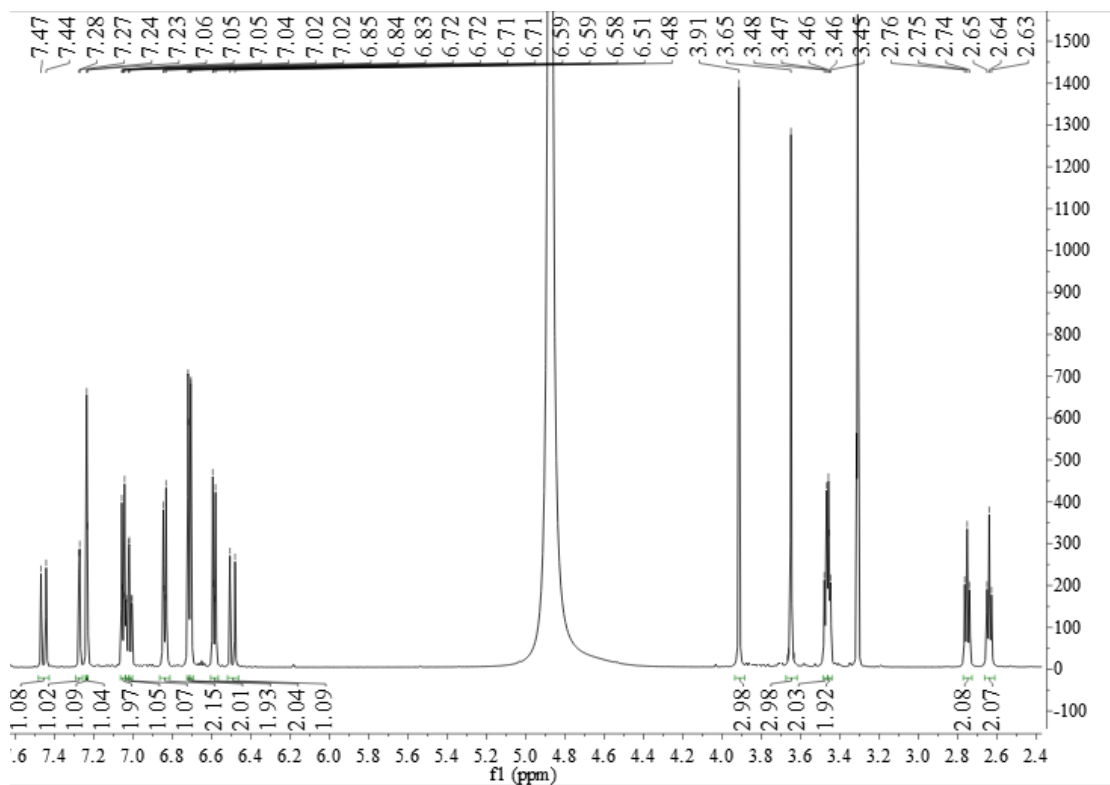

Figure S3-1. <sup>1</sup>H NMR spectrum (600 MHz) of compound 3 in methanol-*d*<sub>4</sub>

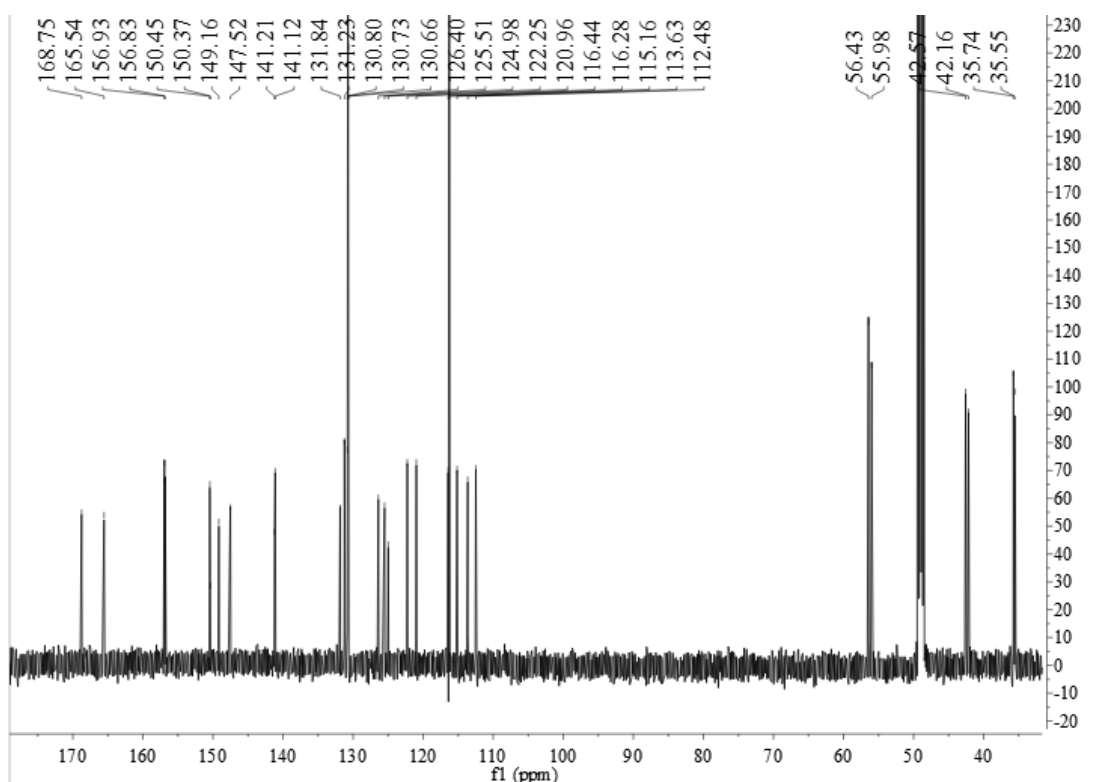

Figure S3-2.  $^{13}\text{C}$  NMR spectrum (150 MHz) of compound **3** in methanol- $d_4$

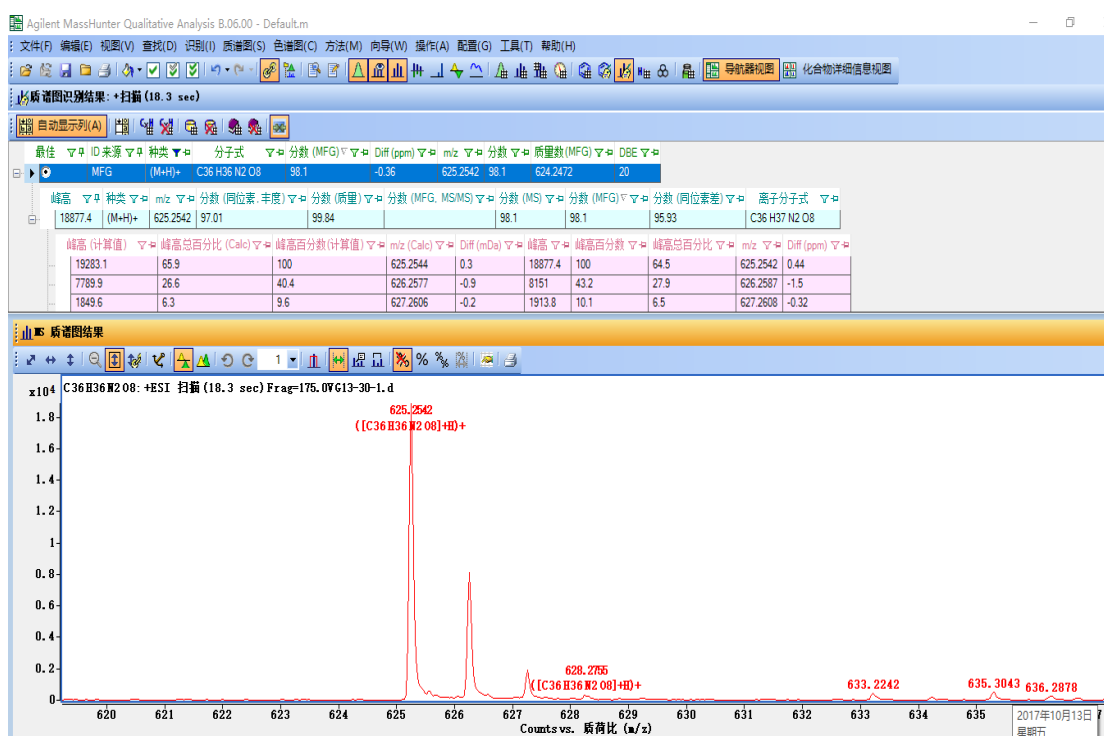

Figure S3-3. HR-ESI-MS of compound **3**

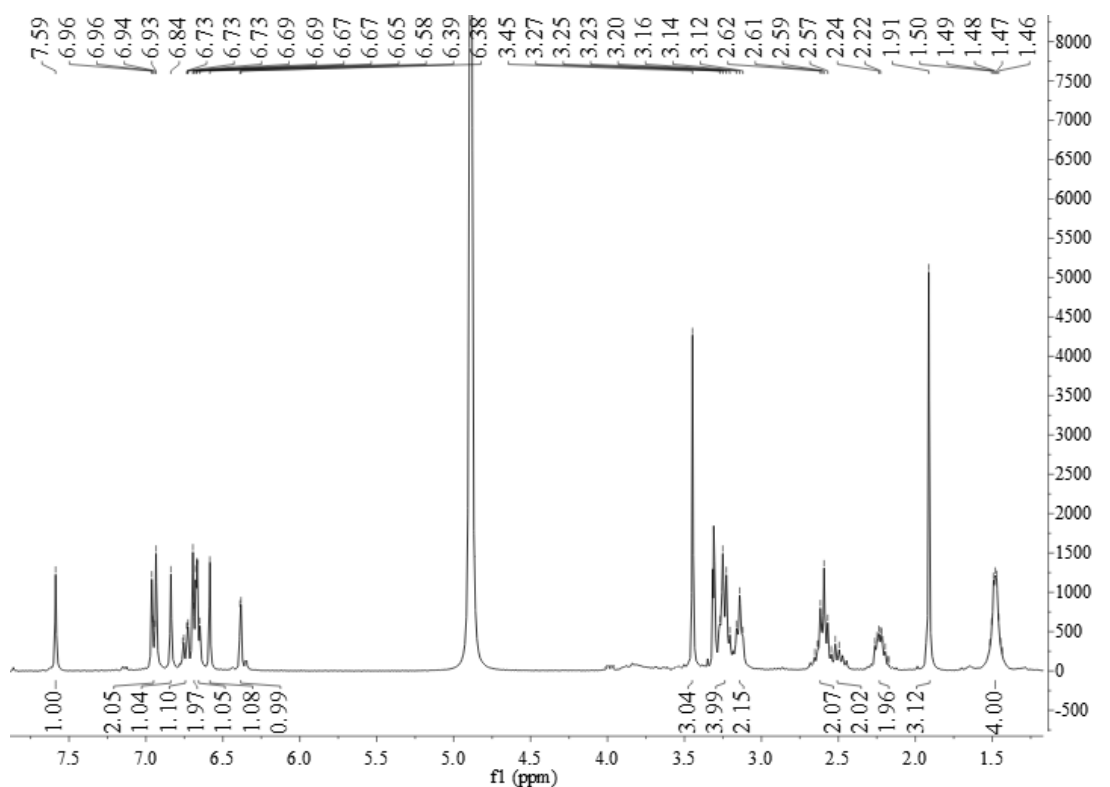

**Figure S4-1.**  $^1\text{H}$  NMR spectrum (300 MHz) of compound **4** in methanol- $d_4$

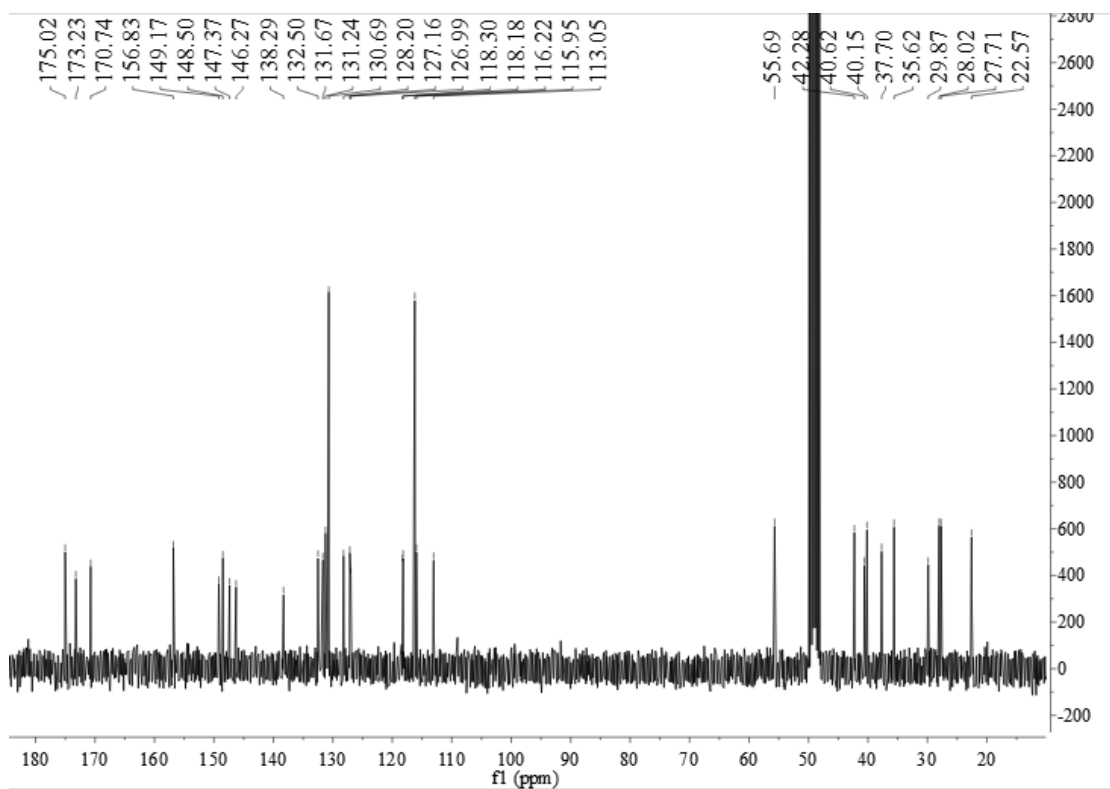

**Figure S4-2.**  $^{13}\text{C}$  NMR spectrum (75 MHz) of compound **4** in methanol- $d_4$

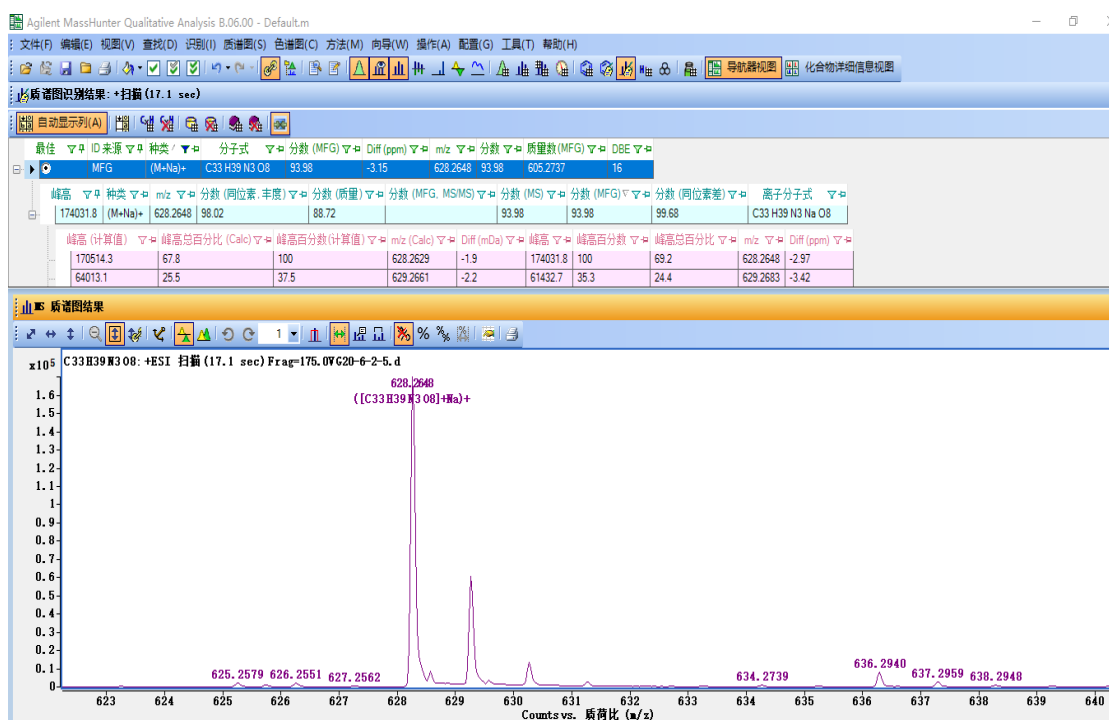

Figure S4-3. HR-ESI-MS of compound 4

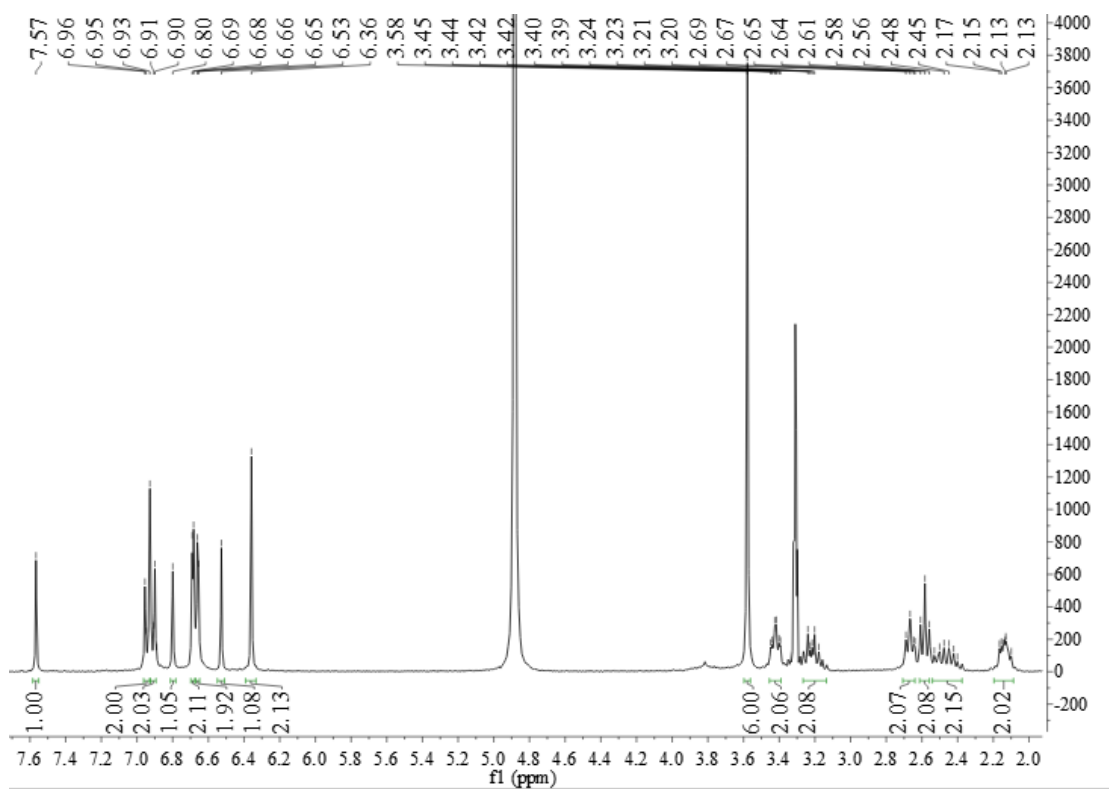

Figure S5-1. <sup>1</sup>H NMR spectrum (300 MHz) of compound 5 in methanol-*d*<sub>4</sub>

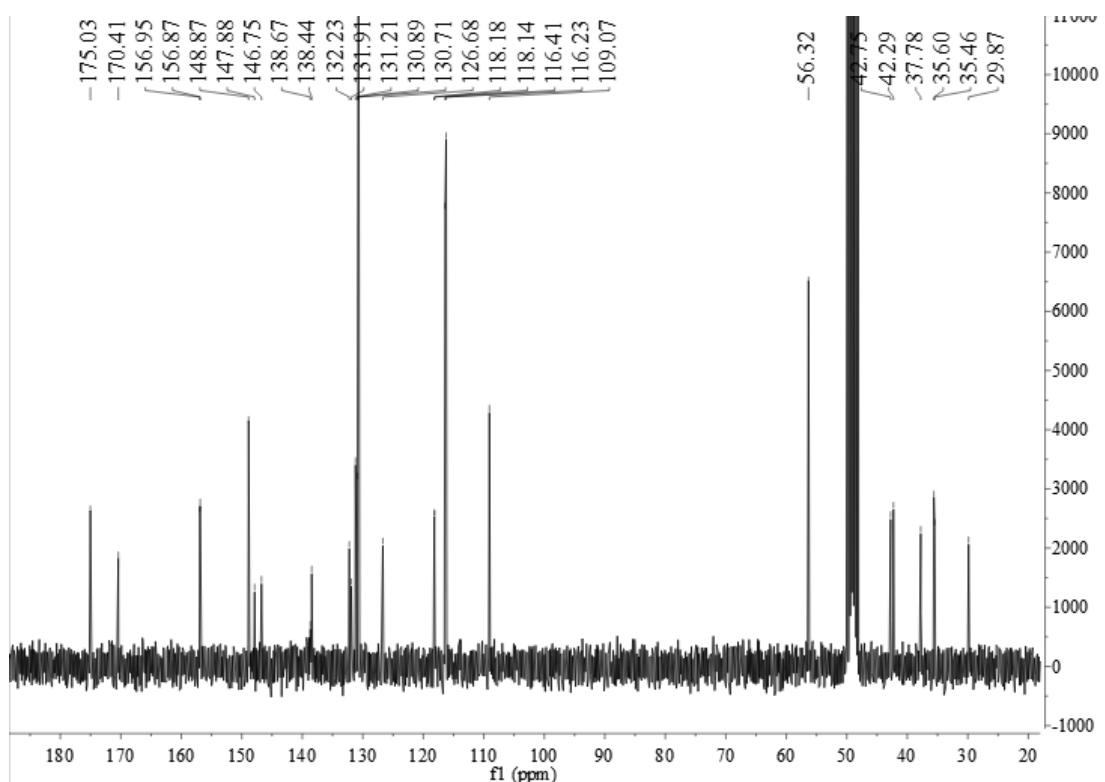

Figure S5-2.  $^{13}\text{C}$  NMR spectrum (75 MHz) of compound **5** in methanol- $d_4$

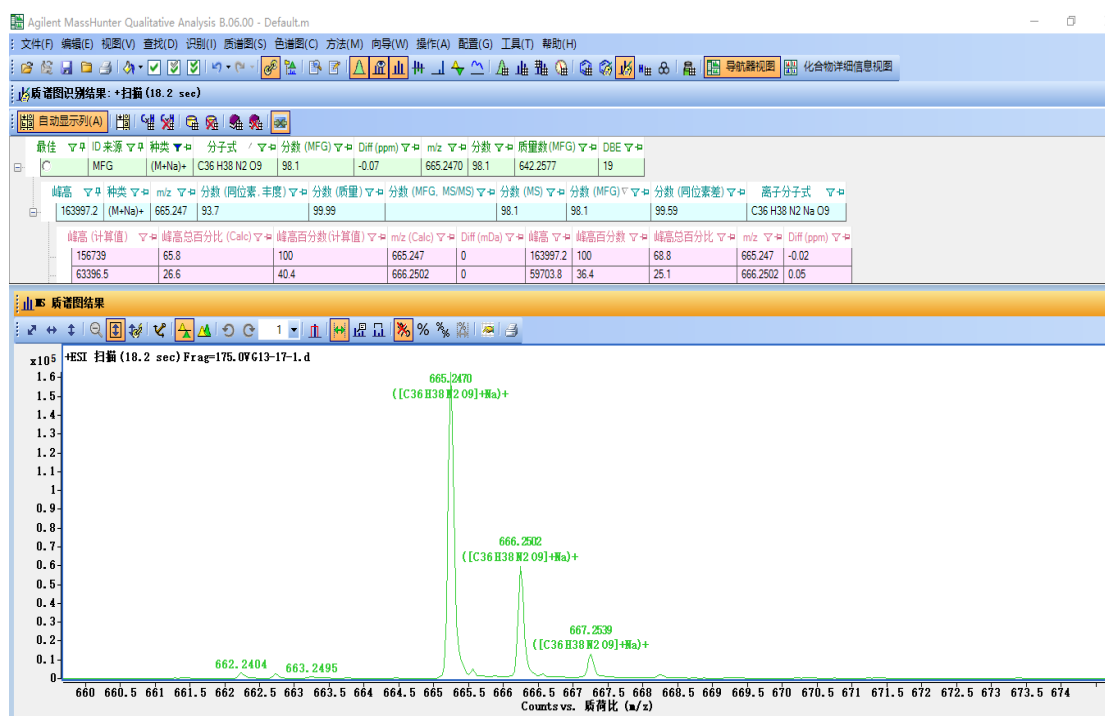

Figure S5-3. HR-ESI-MS of compound **5**
